# Effect of a Nurse-Directed Diabetes Disease Management Program on Urgent Care/Emergency Room Visits and Hospitalizations in a Minority Population

MAYER B. DAVIDSON, MD<sup>1</sup>ADEELA ANSARI, MD<sup>1</sup>VICKI J. KARLAN, MPH<sup>2</sup>

**OBJECTIVE** — To evaluate whether nurse-directed diabetes care reduced preventable diabetes-related urgent care/emergency room visits and hospitalizations in a minority population.

**RESEARCH DESIGN AND METHODS** — Diabetic patients who receive care in a county public health clinic were randomly selected for a Diabetes Managed Care Program (DMCP) in which a specially trained nurse followed detailed treatment algorithms to provide diabetes care for 1 year. Preventable diabetes-related urgent care/emergency room visits and hospitalizations for these patients incurred during the intervention year and the year before enrollment were compared. Preventable diabetes-related causes were defined as metabolic (diabetic ketoacidosis, hyperglycemia, or hypoglycemia) or infection (cellulitis, foot ulcer, osteomyelitis, fungal infection, or urinary tract infection).

**RESULTS** — Use of the urgent care/emergency room and hospitalizations during the intervention year and the year prior were available for 331 patients who completed the DMCP intervention. There were 94 total urgent care/emergency room visits and hospitalizations in the year before entering the DMCP and 46 during the DMCP year, a 51% reduction. Preventable diabetes-related episodes were far fewer. During the prior year, 14 patients made 15 urgent care/emergency room visits and 5 patients incurred 6 hospitalizations. During the DMCP year, four different patients made five emergency room/urgent care visits and one other patient was hospitalized. Preventable diabetes-related use was significantly ( $P < 0.001$ ) lower during the intervention year compared with the prior year. Total charges for urgent care/emergency room visits and hospitalizations only (not other charges related to diabetes care) during the year before entering the DMCP were \$129,176 compared with \$24,630 during the DMCP year.

**CONCLUSIONS** — When compared with usual care, nurse-directed diabetes care resulted in significantly fewer urgent care/emergency room visits and hospitalizations for preventable diabetes-related causes. Policy makers seeking to improve diabetes care and conserve resources should seriously consider adopting this approach.

*Diabetes Care* 30:224–227, 2007

The American Diabetes Association (ADA) has promulgated evidence-based guidelines that lead to improved diabetes care processes and outcome measures (1). Disappointingly,

all three outcome measures (A1C, LDL cholesterol, and blood pressure levels) are met in <10% of people with diabetes (2–4). Unfortunately, most approaches used to improve diabetes outcome measures

have been ineffective in practice. These include: 1) reminding patients about appointments (5,6); 2) providing feedback information on patients to their treating physicians (7–10), even when treatment recommendations for the patient were included (11,12); 3) case management (when the case manager could not make treatment decisions) (13,14); 4) physician education (15,16); and 5) multifaceted quality improvement interventions in the practice setting (17,18).

Outcomes of diabetes care are generally worse in minority populations (19), though there are very few intrinsic racial/ethnic differences that can account for the increased complications of diabetes in these populations. With the exception of a slight increase in renal disease, complications among minorities were similar to those in Caucasians when everyone had access to the same medical care (20,21).

To improve diabetes care in an inner-city population, we completed and recently published the results of a Diabetes Managed Care Program (DMCP) in which a specially trained registered nurse treated 367 patients following detailed treatment algorithms for diabetes care for 1 year (22). An endocrinologist (M.B.D.) was available by phone and met with the nurse once a week. ADA process measures were met 98% of the time, and the mean and median A1C levels were 7.0 and 6.7%, respectively. Sixty percent of the patients met the ADA A1C goal and 82% the LDL cholesterol goal.

This article describes the effect of nurse-directed diabetes care on preventable diabetes-related urgent care/emergency room visits as well as hospitalizations in the 331 diabetic patients who completed the DMCP intervention and also received usual care in the same clinic for the year before program enrollment.

## RESEARCH DESIGN AND METHODS

A total of 367 diabetic patients were randomized and followed by a specially trained nurse in the DMCP for 1 year (22). Of those, 331 patients had

From the <sup>1</sup>Clinical Center for Research Excellence, Charles R. Drew University, Los Angeles, California; and <sup>2</sup>Pfizer Health Solutions, Santa Monica, California.

Address correspondence and reprint requests to Mayer B. Davidson, MD, Clinical Center for Research Excellence, Charles R. Drew University, 1731 East 120th St., Los Angeles, CA 90059. E-mail: mayerdavidson@cdrewu.edu.

Received for publication 28 September 2006 and accepted in revised form 16 November 2006.

Additional information for this article can be found in an online appendix at <http://dx.doi.org/10.2337/dc06-2022>.

**Abbreviations:** ADA, American Diabetes Association; DMCP, Diabetes Managed Care Program.

A table elsewhere in this issue shows conventional and Système International (SI) units and conversion factors for many substances.

DOI: 10.2337/dc06-2022

© 2007 by the American Diabetes Association.

The costs of publication of this article were defrayed in part by the payment of page charges. This article must therefore be hereby marked "advertisement" in accordance with 18 U.S.C. Section 1734 solely to indicate this fact.

been followed in this county clinic during the year before entering the DMCP. The algorithms used to treat patients enrolled in the DMCP covered glycemic control including those for diet therapy alone; sulfonylurea agents and metformin, either alone or in combination; a glitazone added to maximal (tolerated) doses of metformin and a sulfonylurea agent; bedtime NPH insulin plus daytime oral antihyperglycemia drugs; and a split-mixed insulin regimen with NPH and regular insulin. There were also algorithms and protocols for evaluating and managing lipid disorders, evaluating nephropathy, and treating microalbuminuria (see online appendix, available at <http://dx.doi.org/10.2337/dc06-2022>).

Urgent care and emergency room visits were analyzed together because patients access the urgent care center when it is open at the community clinic and use the emergency room at the hospital when the clinic is closed. Thus, reasons for using one or the other is logistical, not medical. The urgent care/emergency room visits and hospitalizations during the DMCP year in these 331 patients were compared with the year before enrolling into the DMCP. This study received approval from the institution review board at Charles R. Drew University. Urgent care/emergency room and hospitalization data for these 331 patients were obtained from the county's management information system. The first five discharge diagnoses and the total charges specific for each visit or hospitalization (not charges related to diabetes care per se) were recorded. Preventable diabetes-related visits and hospitalizations were defined as either metabolic (diabetic ketoacidosis, hyperglycemia, or hypoglycemia) or infection (cellulitis, foot ulcer, osteomyelitis, fungal infection, or urinary tract infection). Other possible diabetes-related diagnoses that could not be realistically affected by 1 year of appropriate diabetes care, such as angina, myocardial infarction, stroke, and non-diabetes-related causes (e.g., gynecological surgery or psychiatric visits), were excluded from the analysis. The assignment of causes for visits and hospitalizations was carried out by one of the authors (A.A.) who was blinded to when (year prior or DMCP year) the visit or hospitalization occurred. When the primary reason for the urgent care/emergency room visit or hospitalization was not clear, she obtained the chart for review.

Continuous variables were analyzed

**Table 1—Baseline demographic characteristics**

|                              |             |
|------------------------------|-------------|
| Total patients (n)           | 331         |
| Age (years)                  | 51.8 ± 11.9 |
| Duration of diabetes (years) | 7.6 ± 7.1   |
| Female (%)                   | 84          |
| Race/ethnicity               |             |
| African American             | 72 (21.8)   |
| Latino                       | 255 (77.0)  |
| Caucasian                    | 2 (0.6)     |
| Asian                        | 2 (0.6)     |
| Type 1 diabetes              | 2 (0.6)     |
| Type 2 diabetes              | 329 (99.4)  |

Data are years ± SD or n (%) unless otherwise indicated.

with the Student's paired *t* test. Categorical variables were analyzed with the  $\chi^2$  test. The rates of emergency room/urgent care visits and hospitalizations were analyzed with a Z test for the difference of two Poisson rates. Significance was accepted at a 0.05 level (two tailed).

**Table 2—Preventable diabetes-related urgent care and emergency room visits and hospitalizations**

| Patient    | Activity        | Diagnosis                    | Charges (\$) |
|------------|-----------------|------------------------------|--------------|
| Year prior |                 |                              |              |
| 1          | UC/ER           | Otitis externa and interna   | 350          |
| 2          | UC/ER           | Cellulitis/abscess           | 500          |
| 3          | UC/ER           | Hyperglycemia                | 125          |
| 4          | UC/ER           | Candidiasis                  | 700          |
| 5          | UC/ER           | Hyperglycemia                | 300          |
| 5          | Hospitalization | Hyperglycemia                | 13,670       |
| 6          | Hospitalization | Hyperglycemia                | 6,835        |
| 7          | UC/ER           | Hyperglycemia                | 350          |
| 8          | UC/ER           | Hyperglycemia                | 1,300        |
| 9          | UC/ER           | Hyperglycemia                | 700          |
| 9          | UC/ER           | Hyperglycemia                | 500          |
| 10         | UC/ER           | Urinary tract infection      | 700          |
| 11         | UC/ER           | Hyperglycemia                | 700          |
| 12         | UC/ER           | Hyperglycemia                | 700          |
| 13         | UC/ER           | Hyperglycemia                | 700          |
| 14         | UC/ER           | Hyperglycemia                | 700          |
| 15         | UC/ER           | Hyperglycemia                | 175          |
| 16         | Hospitalization | Pyelonephritis and DKA       | 13,670       |
| 17         | Hospitalization | Cellulitis/abscess           | 20,505       |
| 18         | Hospitalization | Cellulitis/abscess           | 18,856       |
| 18         | Hospitalization | Osteomyelitis                | 47,140       |
| DMCP year  |                 |                              |              |
| 19         | UC/ER           | Fungal infection             | 125          |
| 20         | UC/ER           | Cellulitis/abscess           | 700          |
| 20         | UC/ER           | Follow-up cellulitis/abscess | 700          |
| 21         | UC/ER           | Foot ulcer                   | 700          |
| 22         | UC/ER           | Hyperglycemia                | 1,900        |
| 23         | Hospitalization | Cystitis and hyperglycemia   | 20,505       |

DKA, diabetic ketoacidosis; UC/ER, urgent care/emergency room.

**RESULTS**— The baseline demographics of the 331 patients at time of entry into the DMCP are shown in Table 1. Baseline A1C levels were  $8.8 \pm 2.5\%$  (SD), which fell to  $7.1 \pm 1.4\%$  after 1 year in the DMCP ( $P < 0.001$ ). At entry into the DMCP, 28% met the ADA A1C goal of  $<7.0\%$  compared with 64% after 1 year ( $P < 0.002$ ). At entry into the DMCP, 37% met the ADA LDL cholesterol goal, whereas 80% met it after 1 year ( $P < 0.04$ ).

There were 95 total urgent care/emergency room visits and hospitalizations in the year before entering the DMCP compared with 52 during the DMCP year, a 45% reduction. However, there were far fewer visits and hospitalizations for preventable diabetes-related causes (Table 2). During the prior year, 14 patients made 15 emergency room/urgent care visits (11 for metabolic reasons and 4 for infections) and 5 patients had 6 hospitalizations (2 for a metabolic reason and 4 for infection). One patient had two ur-

gent care/emergency room visits, one had two hospitalizations, and a third had one of each.

During the DMCP year, four different patients made five urgent care/emergency room visits (one for a metabolic reason and four for infection) and another one was hospitalized for an infection. Note that there was only 1 episode of hyperglycemia during the DMCP year resulting in an urgent care/emergency room visit compared with the year before entering the DMCP in which 11 episodes of hyperglycemia caused urgent care/emergency room visits and 2 resulted in hospitalizations (Table 2). This difference highlights the marked effect of nurse-directed care on preventable diabetes-related metabolic causes of patients interacting with the medical care system outside of regular clinic hours. The difference between the year prior and the DMCP year for all preventable diabetes-related urgent care/emergency room visits and hospitalizations was significantly different ( $P < 0.001$ ). Total charges specific for these urgent care/emergency room visits and hospitalizations during the year before entering the DMCP were \$129,176 compared with \$24,630 during the DMCP year.

**CONCLUSIONS**— Nurse (23–34)- and pharmacist (35–37)-directed care have been shown to yield better process and surrogate outcome measures when compared with standard medical care. Only one study evaluated a clinical outcome. Fewer patients cared for by a nurse developed diabetic retinopathy than those receiving standard care (38). This is the first study to compare urgent care/emergency room use and hospitalizations by patients with diabetes receiving nurse-directed care compared with standard care. The results convincingly demonstrate lower resource use among diabetic patients under nurse-directed care. Although there was no control group followed under standard care for 2 years to rule out the possibility that a learning curve accounted for these results, this seems highly unlikely. The average duration of diabetes was 7.6 years, surely long enough for patients to have learned how to take measures to avoid urgent care/emergency room visits and hospitalizations for preventable diabetes-related causes if they could. More likely, one of the reasons for the success of the DMCP was the self-management skills taught to the patients by the nurse during their year under her care.

There are several limitations to this study. Although it is possible that the patients used other centers that were not part of the county system resulting in an underestimate of actual services used, this is unlikely to have influenced the results for two reasons. First, only 15% of the population cared for in this county clinic have any medical insurance, making it unlikely for them to seek care elsewhere. Second, to account for these results, seeking care outside of the system would have had to occur much more frequently during the DMCP year than in the year prior, also very unlikely. The differences between nurse-directed and standard care may be greater in this minority population when compared with other populations. Finally, total charges do not reflect actual costs of care or reimbursement; therefore the amount of cost savings cannot easily be determined from these data.

In conclusion, nurse-directed diabetes care in this minority population resulted in less use of urgent care/emergency room centers as well as fewer hospitalizations for preventable diabetes-related conditions. Policy makers who seek to improve diabetes care and conserve resources should seriously consider adopting this approach.

**Acknowledgments**— This study was funded by the American Diabetes Association; Pfizer Health Solutions, Inc.; and Merck & Co. Dr. Davidson was supported by National Institutes of Health Grant U54-RR014616.

The authors are grateful to Robert Stevens for accessing the county computer system and identifying which patients had urgent care/emergency room visits and hospitalizations and for providing the ICD-9 codes and the total charges for each visit and hospitalization and to Martin L. Lee, PhD, for statistical advice.

## References

1. American Diabetes Association: Standards of medical care in diabetes—2006 (Position Statement). *Diabetes Care* 29 (Suppl. 1):S4–S42, 2006
2. Saydeh SH, Fradkin J, Cowie CC: Poor control of risk factors for vascular disease among adults with previously diagnosed diabetes. *JAMA* 291:335–342, 2004
3. McFarlane SI, Jacober SJ, Winer N, Kaur J, Castro JP, Wui MA, Gliwa A, Von Gizycki H, Sowers JR: Control of cardiovascular risk factors in patients with diabetes and hypertension at urban academic medical centers. *Diabetes Care* 25:718–723, 2002
4. Grant RW, Buse JB, Meigs JB, for the University HealthSystem Consortium Benchmarking Project Team: Quality of diabetes care in U.S. academic medical centers. *Diabetes Care* 28:337–442, 2005
5. Piette JD, Weinberger MD, Kraemer FB, McPhee SJ: Impact of automated calls with nurse follow-up on diabetes treatment outcomes in a Department of Veterans Affairs Health Care System: a randomized controlled trial. *Diabetes Care* 24:202–208, 2001
6. Shandro MT, Pick ME, Gruninger A, Ryan EA: Diabetes care: interventions in the community (Letter). *Diabetes Care* 25: 941, 2002
7. Lobach DF, Hammond WE: Computerized decision support based on a clinical practice guideline improves compliance with care standards. *Am J Med* 102:89–98, 1997
8. Deichmann RE, Castello E, Horswell R, Friday KE: Improvements in diabetic care as measured by HbA<sub>1c</sub> after a physician education project. *Diabetes Care* 22:1612–1616, 1999
9. Petitti DB, Contreras R, Ziel FH, Dudl J, Domurat ES, Hyatt JA: Evaluation of the effect of performance monitoring and feedback on care process, utilization, and outcome. *Diabetes Care* 23:192–196, 2000
10. Demakis JG, Beauchamp C, Cull WL, Denwood R, Eisen SA, Lofgren R, Wooliscroft J, Henderson WG: Improving residents' compliance with standards of ambulatory care: results from the VA Cooperative Study on Computerized Reminders. *JAMA* 284:1411–1416, 2000
11. Ilag LL, Martin CL, Tabei BP, Isaman DJM, Burke R, Greene DA, Herman WH: Improving diabetes processes of care in managed care. *Diabetes Care* 26:2722–2727, 2003
12. Grant RW, Cagliero E, Sullivan CM, Dubey AK, Estey GA, Weil EM, Gesmundo J, Nathan DM, Singer DE, Cheuh HC, Meigs JB: A controlled trial of population management: diabetes mellitus: putting evidence into practice (DM-PEP). *Diabetes Care* 27:2299–2305, 2004
13. Krein SL, Klamerus ML, Vijan S, Lee JL, Fitzgerald JT, Parlow A, Reeves P, Hayward RA: Case management for patients with poorly controlled diabetes: a randomized trial. *Am J Med* 116:732–739, 2004
14. Glasgow RE, Nutting PA, King DK, Nelson CC, Cutter G, Gaglio B, Rahm AK, Whitesides H: Randomized effectiveness trial of a computer-assisted intervention to improve diabetes care. *Diabetes Care* 28: 33–39, 2005
15. Kirkman MS, Williams SR, Caffrey HA, Marrero DG: Impact of a program to improve adherence to diabetes guidelines by primary care physicians. *Diabetes Care* 25: 1946–1951, 2002
16. Hirsch IB, Goldberg HI, Ellsworth A, Evans TC, Herter CD, Ramsey SD, Mullen M, Neighvor WE, Cheadle AD: A multi-



- faceted intervention in support of diabetes treatment guidelines: a controlled trial. *Diabetes Res Clin Pract* 58:27–36, 2002
17. Majumdar SR, Guirguis LM, Toth EL, Lewanczuk RZ, Lee TK, Johnson JA: Controlled trial of a multifaceted intervention for improving quality of care for rural patients with type 2 diabetes. *Diabetes Care* 26:3061–3066, 2003
  18. Chin MH, Cook S, Drum ML, Jin L, Guillen M, Humikowski CA, Koppert J, Harrison JF, Lippoid S, Schaefer CT: Improving diabetes care in Midwest community health centers with the health disparities collaborative. *Diabetes Care* 27:2–8, 2004
  19. Lanting LC, Joung IMA, Mackenbach JP, Lamberts SWJ, Bootsma AH: Ethnic differences in mortality, end-stage complications, and quality of care among diabetic patients: a review. *Diabetes Care* 28: 2280–2288, 2005
  20. Karter AJ, Ferrara A, Liu JY, Moffet HH, Ackerson LM, Selby JV: Ethnic disparities in diabetic complications in an insured population. *JAMA* 287:2519–2527, 2002
  21. Jha AK, Shlipak MG, Hosmer W, Frances CD, Browner WS: Racial differences in mortality among men hospitalized in the Veterans Affairs Health Care System. *JAMA* 285:297–303, 2001
  22. Davidson MB, Castellanos M, Duran P, Karlan V: Effective diabetes care by a registered nurse following treatment algorithms in a minority population. *Am J Manag Care* 12:226–232, 2006
  23. Legorreta AP, Peters AL, Ossorio C, Lopez RJ, Jatulis D, Davidson MB: Effect of a comprehensive nurse-managed diabetes program: an HMO study. *Am J Manag Care* 2:1024–1030, 1996
  24. Aubert RE, Herman WH, Waters J, Moore W, Sutton D, Peterson BL, Bailey CM, Koplan JP: Nurse case management to improve glycemic control in diabetic patients in a health maintenance organization: a randomized, controlled trial. *Ann Intern Med* 129:605–612, 1998
  25. Peters AL, Davidson MB: Application of a diabetes managed care program: the feasibility of using nurses and a computer system to provide effective care. *Diabetes Care* 21:1037–1043, 1998
  26. Sidorov J, Gabbay R, Harris R, Shull RD, Girolami S, Tomcavaog J, Starkey R, Hughes R: Disease management for diabetes mellitus: impact on hemoglobin A<sub>1c</sub>. *Am J Manag Care* 6:1217–1226, 2000
  27. Davidson MB: Effect of nurse-directed diabetes care in a minority population. *Diabetes Care* 26:2281–2287, 2003
  28. Taylor CB, Miller NH, Reilly KR, Greenwald G, Cunniff D, Deeter A, Abascal L: Evaluation of a nurse care management system to improve outcomes in patients with complicated diabetes. *Diabetes Care* 26:1058–1063, 2003
  29. Polonsky WH, Earles J, Smith S, Pease DJ, Macmillan M, Christensen R, Taylor T, Deckert J, Jackson RA: Integrating medical management with diabetes self-management training: a randomized control trial of the Diabetes Outpatient Intensive Treatment program. *Diabetes Care* 26: 3048–3053, 2003
  30. Craig KJ, Donovan K, Munnery M, Owens DR, Williams JD, Philips AO: Identification and management of diabetic nephropathy in the diabetes clinic. *Diabetes Care* 26:1806–1811, 2003
  31. New JP, Mason JM, Freemantle N, Teasdale S, Wong LM, Bruce NJ, Burns JA, Gibson JM: Specialist nurse-led intervention to treat and control hypertension and hyperlipidemia in diabetes (SPLINT): a randomized controlled trial. *Diabetes Care* 26:2250–2255, 2003
  32. Philis-Tsimikas A, Walker C, Rivard LR, Talavera G, Reimann JOF, Salmon M, Araujo R: Improvement in diabetes care of underinsured patients enrolled in Project Dulce: a community-based, culturally appropriate, nurse case management and peer education diabetes care model. *Diabetes Care* 27:110–115, 2004
  33. The California Medi-Cal Type 2 Diabetes Study Group: Closing the gap: effect of diabetes case management on glycemic control among low-income ethnic minority populations. *Diabetes Care* 27:95–103, 2004
  34. Fanning EL, Selwyn BJ, Larme AC, DeFronzo RA: Improving efficacy of diabetes management using treatment algorithms in a mainly Hispanic population. *Diabetes Care* 27:1638–1646, 2004
  35. Davidson MB, Karlan VJ, Hair TL: Effect of a pharmacist-managed diabetes care program in a free medical clinic. *Am J Med Qual* 15:137–142, 2000
  36. Leal S, Glover JJ, Herrier RN, Felix A: Improving quality of care in diabetes through a comprehensive pharmacist-based disease management program. *Diabetes Care* 27:2983–2984, 2004
  37. Rothman RL, Malone R, Bryant B, Shintani AK, Crigler B, Dewalt DA, Weinberger M, Pignone MP: A randomized trial of a primary care-based disease management program to improve cardiovascular risk factors and glycated hemoglobin levels in patients with diabetes. *Am J Med* 276–284, 2005
  38. Pettit DJ, Wollitzer AO, Jovanovic L, He G, Ipp E, the California Medi-Cal Type 2 Diabetes Study Group: Decreasing the risk of diabetic retinopathy in a study of case management: the California Medi-Cal Type 2 Diabetes Study. *Diabetes Care* 28:2819–2822, 2005
